# Supplementary material for: Case Report: True Motor Recovery of Upper Limb Beyond 5 Years Post-stroke
Source: PubMed Central journal article supplement (PMC8891374; doi:10.3389/fneur.2022.804528), 2022-02-17
Supplement: Table_1.pdf [file Table_1.pdf]

**Table 1: Brain areas activated during a finger opposition movement of the left and right hands in ten healthy control subjects compared to rest.**

| Cerebral area            |   | Left hand    |      |                                  |     |     | Right hand   |      |                                  |     |    |
|--------------------------|---|--------------|------|----------------------------------|-----|-----|--------------|------|----------------------------------|-----|----|
|                          |   | Cluster size | Z    | Activation peak coordinates (mm) |     |     | Cluster size | Z    | Activation peak coordinates (mm) |     |    |
|                          |   |              |      | x                                | y   | z   |              |      | x                                | y   | z  |
| Supplementary motor      | R |              |      |                                  |     | 107 | 4.72         | 6    | 2                                | 64  |    |
| Precentral               | R | 1986         | 5.6  | 33                               | -13 | 52  | 999          | 5.31 | -32                              | -18 | 58 |
|                          | L |              |      |                                  |     |     |              |      |                                  |     |    |
| Frontoparietal operculum | R | 105          | 5.25 | 54                               | -21 | 19  | 729          | 5.4  | -51                              | -22 | 13 |
|                          | L |              |      |                                  |     |     |              |      |                                  |     |    |
| Cerebellum               | R |              |      |                                  |     | 656 | 5.75         | 12   | -60                              | -12 |    |
|                          | L | 1191         | 5.36 | -24                              | -49 | -23 |              |      |                                  |     |    |

The coordinates of the local maximum and the Z score are displayed for each significantly activated cluster of more than 100 voxels ( $p < 0.05$ , FWE corrected). The origin of the coordinates is at the anterior commissure in the Talairach space.

Abbreviations: R, right; L, left.
